# Supplementary material for: Induction of Monoterpenoid Oxindole Alkaloids Production and Related Biosynthetic Gene Expression in Response to Signaling Molecules in Hamelia patens Plant Cultures
Source: MDPI journal article supplement (doi:10.3390/plants13070966), 2024-03-27

## Supplementary material

### Supplementary material 1.

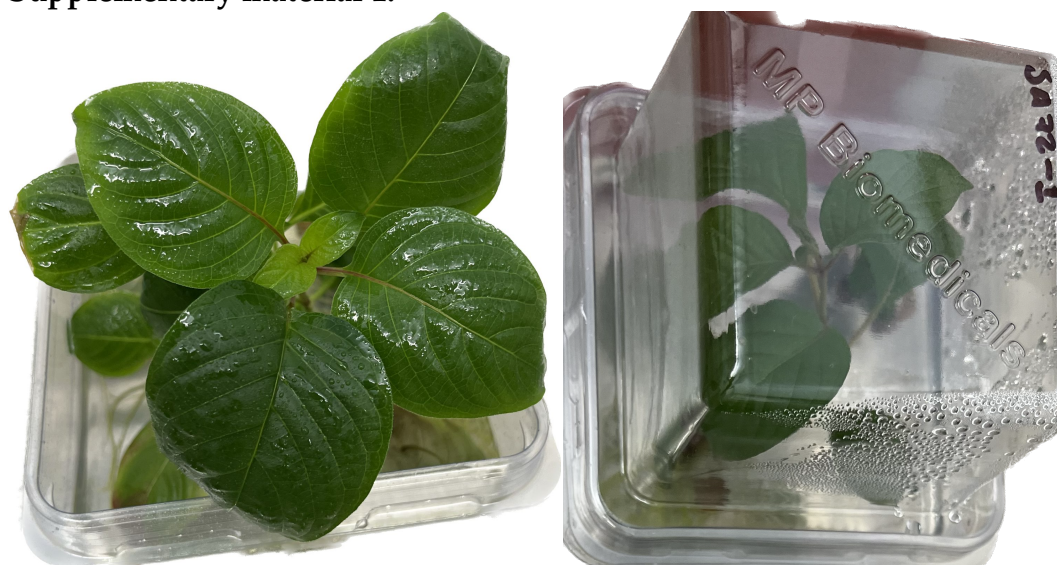

**Figure S1.** *H. patens* micropropagated plants used for the elicitation experiments.

**Table S1.** Downloaded files of transcriptomes and gene sequences of MIA-producing plants.

| Plant species                  | Prefix | Family      | Accession number | Transcriptome source                                                  | Ref  |
|--------------------------------|--------|-------------|------------------|-----------------------------------------------------------------------|------|
| FASTA files                    |        |             |                  |                                                                       |      |
| <i>Amsonia hubrichtii</i>      | Ahu    | Apocynaceae | SPRX096091       | PhytoMetaSyn (www.phytometasyn.ca)                                    | [52] |
| <i>Cinchona ledgeriana</i>     | Cle    | Rubiaceae   | -                | PhytoMetaSyn (www.phytometasyn.ca)                                    | -    |
| <i>Vinca minor</i>             | Vmi    | Apocynaceae | -                | PhytoMetaSyn (www.phytometasyn.ca)                                    | -    |
| <i>Tabernaemontana elegans</i> | Tee    | Apocynaceae | SPRX096093       | PhytoMetaSyn (www.phytometasyn.ca)                                    | [52] |
| <i>Rauwolfia serpentina</i>    | Rsa    | Apocynaceae | -                | http://medicinalplantgenomics.msu.edu/                                | [53] |
| <i>Camptotheca acuminata</i>   | Caa    | Nyssaceae   | -                | http://medicinalplantgenomics.msu.edu/                                | [53] |
| <i>Ophiorrhiza pumila</i>      | Opa    | Rubiaceae   | -                | http://ngs-data-archive.psc.riken.jp/pub/ophiorrhiza_pumila/download/ | [54] |
| <i>Catharanthus roseus</i>     | Cro    | Apocynaceae | -                | http://medicinalplantgenomics.msu.edu/                                | [53] |
| Short Read Archive (SRA) files |        |             |                  |                                                                       |      |
| <i>Rhazya stricta</i>          | Rsi    | Apocynaceae | SRP028239        | Genbank NCBI (www.ncbi.nlm.nih.gov)                                   | [55] |
| <i>Hamelia patens</i>          | Hpa    | Rubiaceae   | SRP079620        | Genbank NCBI (www.ncbi.nlm.nih.gov)                                   | [49] |
| <i>Uncaria rhynchophylla</i>   | Ury    | Rubiaceae   | SRX362039        | Genbank NCBI (www.ncbi.nlm.nih.gov)                                   | [56] |

|                           |            |           |            |                                     |      |
|---------------------------|------------|-----------|------------|-------------------------------------|------|
| <i>Mitragyna speciosa</i> | <i>Msp</i> | Rubiaceae | SRX2855178 | Genbank NCBI (www.ncbi.nlm.nih.gov) | [57] |
|---------------------------|------------|-----------|------------|-------------------------------------|------|

Table S2. MIA-biosynthesis gene sequences

| Species                      | Gene                               | Code             | Accession N° GenBank     | Bibliography |
|------------------------------|------------------------------------|------------------|--------------------------|--------------|
| <i>Catharanthus roseus</i>   | Loganic Acid Methyl-Transferase    | <i>CroLAMT</i>   | ABW38009.1               | [12]         |
|                              | Tryptophan decarboxylase           | <i>CroTDC</i>    | CAA47898.1               | [58]         |
|                              | Strictosidine synthase             | <i>CroSTR</i>    | CAA43936.1               | [59]         |
|                              | Strictosidine beta-glucosidase     | <i>CroSGD</i>    | AAF28800.1               | [17]         |
|                              | Tetrahydroalstonine synthase       | <i>CroTHAS</i>   | AKF02528.1               | [16]         |
|                              | Heteroyohimbine synthase           | <i>CroHYS</i>    | ANQ45225.1               | [18]         |
|                              | Nitrate/Peptide Family Transporter | <i>CroNPF2.9</i> | AQM73449.1               | [14]         |
|                              | Elongation factor 1 -alpha         | <i>CroEF1-α</i>  | ABV58644.1               | [49]         |
| <i>Mitragyna speciosa</i>    | Strictosidine synthase             | <i>MspSTR</i>    | EU288197.1               | -            |
| <i>Ophiorrhiza pumila</i>    | Strictosidine synthase             | <i>OpuSTR</i>    | AB060341.1               | [54]         |
| <i>Ophiorrhiza japonica</i>  | Strictosidine synthase             | <i>OjaSTR</i>    | EU670747.1               | [60]         |
| <i>Uncaria rhynchophylla</i> | Strictosidine synthase             | <i>UrySTR</i>    | OL310251.1<br>ON125563.1 | -            |

Table S3. Degenerated primers for *H. patens* genes amplification

| Gene          | Primer name | Primer Sequence (5'→3')       |
|---------------|-------------|-------------------------------|
| <i>LAMT</i>   | LAMT-F1deg  | THGYDGYTTNGGNTGYTCNDBHGG      |
|               | LAMT-R2deg  | ADNRTANDNNHHNAHGTTGAANGARTC   |
| <i>TDC</i>    | TDC-F1deg   | GARAVHTWYCCDGTYYTTBAGCSAAG    |
|               | TDC-R2deg   | AYTTGCCARTYYTTRWARTCNABNAC    |
| <i>SGD</i>    | SGD-F1deg   | DKCNKCHTWYCARDYDYGARGG        |
|               | SGD-R1deg   | GHDSWRTARTRRTNANNCCNABRWARTC  |
| <i>THAS1</i>  | THAS1-F2deg | AARJJYAARGYHGGDGAYRNRGTNG     |
|               | THAS1-R2deg | GCDGMVAANTCNANCATYTCYTG       |
| <i>THAS2</i>  | THAS2-F2deg | TDRBHD TNARRDTBVYNAARGCNTTHGG |
|               | THAS2-R2deg | TKHKBNGCDGCRAANTYNANCATYTC    |
| <i>NPF2.9</i> | NPF-Fdeg    | GGTTTCTCTTYRTVTGGAATGCTGCTTC  |
|               | NPF-Rdeg    | GCTTGTCCYGGAAAATGRAATGCTTCTC  |

Table S4. Primers used for RACE

| Primer                            | Sequence 5'----3'                           |
|-----------------------------------|---------------------------------------------|
| RACE 3'                           |                                             |
| GeneRacer <sup>TM</sup> 3' Primer | 5'-CGCTACGTAACGGCATGACAGTG-3'               |
| <i>HpTHASR-F1</i>                 | 5' GAC GGA ACC CCC ACA TAT GGA GG 3'        |
| <i>HpTHASR-F2</i>                 | 5' ACC TTA GCA TAG GAA GGA AAA TTG 3'       |
| <i>HpTDCR-F1</i>                  | 5' CTC AAT GAG TTT CAG CCC TCA TAA ATG G 3' |
| <i>HpTDCR-F2</i>                  | 5'TGC TGG TCA AGG CAC TAA GTA CTA AC 3'     |
| <i>HpLAMT-F</i>                   | 5' CTT CAG ATC TCT CCC GCC AAA CAG G 3'     |
| RACE 5'                           |                                             |
| GeneRacer <sup>TM</sup> 5' Primer | 5'-CGACTGGAGCACGAGGACACTGA-3'               |
| <i>HpLAMT-R</i>                   | 5' GAG AGC CAG TGA AGT GCA TAA GAG C 3'     |

Table S5. Primers used for RT-qPCR

| Gene                                      | Primer name      | Primer Sequence                           | Amplicon size (bp) | Mean PCR efficiency |
|-------------------------------------------|------------------|-------------------------------------------|--------------------|---------------------|
| Elongation factor 1- $\alpha$             | EF1- $\alpha$ -F | 5' CTG AAG TTA AGT CTG TTG AGA TGC ACC 3' | 200                | 1.77                |
|                                           | EF1- $\alpha$ -R | 5' GCC AGG GTG GTT CAT GAT GAT GAC C 3'   |                    |                     |
| Loganic Acid Methyltransferase            | LAMT-F           | 5' CTT CAG ATC TCT CCC GCC AAA CAG G 3'   | 126                | 1.85                |
|                                           | LAMT-R           | 5' GAG AGC CAG TGA AGT GCA TAA GAG C 3'   |                    |                     |
| Tryptophan decarboxylase                  | TDC-F            | 5' GTGGATTCATGTTGATGCTGCTTATGC3'          | 90                 | 1.82                |
|                                           | TDC-R            | 5' GAGTCAACTCTCTCAACCCCATCC3'             |                    |                     |
| Strictosidine $\beta$ -D-glucosidase      | SGD-F            | 5' CAC ACA ATC AGC TTC TAG CCC ATG C 3'   | 96                 | 1.81                |
|                                           | SGD-R            | 5' ACA CGA GTG TAA TCC CAA TCT TGC C 3'   |                    |                     |
| Tetrahydroalstonine synthase 1            | THAS1-F          | 5' GGA GTT GGT TGC CTC GTA GGA TC 3'      | 87                 | 1.93                |
|                                           | THAS1-R          | 5' CGT GAA TAT TTG GGC AGG GCA GTA G 3'   |                    |                     |
| Tetrahydroalstonine synthase 2            | THAS2-F          | 5' CTC CCC TTC TCT GTG CTG GGA TC 3'      | 97                 | 1.91                |
|                                           | THAS2-R          | 5' CCA CCA AGG CCA ACC ACA CC 3'          |                    |                     |
| Nitrate/Peptide Strictosidine Transporter | NPF-F            | 5' CGTAATCTCTGGTGCCATCTCTCTC3'            | 103                | 2.08                |
|                                           | NPF-R            | 5' CCTAATCGTTGGAGGGGTGTTGG3'              |                    |                     |
| Strictosidine synthase                    | STR-F            | 5' GTKAGCABMRWMTATGATGACAGAGGTGT3'        | 131                | 2.04                |
|                                           | STR-R            | 5' CCTGGTAYATTYARYCCWTTTCATCAAAACT3'      |                    |                     |

## Supplementary material 2.

### *H. patens* cloned sequences.

#### >HpaLAMT (complete CDS)

ATGGCTCCAACAATGGACACCATCCCAACTGTAGACATCAAGGAAATGCC  
AGAAGAAGCACACCCCATGAAAGGTGGAGATGATTTCAATAGCTATTCTC  
AAAATTCTTGCTATCAGAGGGGAGTTATAGATGCCGCAAAGCTATCATTT  
TTGAAGCAGTAAATGAGAATCTAGAACTTGAGAATAACAAATCTACTTTTCG  
ATCCATCTAAGCCTTTTCGCATTGCTGATTTTGGTTGCTCAACCGGGCCTAA  
CACATTTTTAGCTATGCAAAATATCGTGGAAGCCGTGGAGCAAAAGCACA  
AATCTCTACAAGAAAAAACCAACCCAGAATTCCACGTATTTTTCAATGACC  
ATGTCAACAACGATTTCAACATTCTCTTCAGATCTCTCCCGCCAAACAGGG  
ATTACTTTGCTGCTGGGGTGCCCGGATCGTTTTACACGAGGGTGTACCTAG  
GGCCTGTTTGCATTTTGCTCATTGCTCTTATGCACTTCACTGGCTCTCTAAGG  
TTCCTAAGGAGGTTCAAGACAAGAATTCTCCCGCCTTCAACAAGGGGAGG  
ATTCATTACACCGGGACTGAAAAGCATGTTGTGAAAGCTTACTTTGGTCAG  
TTCCAAAAGGATATGGACGCATTTCTGAAAGCTAGAGCTCAAGAAATTGTG  
GGAGGAGGGTTGATGGTGATTCAAATTCCTGGTCTTCCTAGTGGTGAGGTC  
CTCTTCTCTAGGACTGGTGCTGGAATGCTTCATGCTCTTCTGGGCTCGTCCTT  
GATGGAACCTCGTAACTTTGGGAGTAATAAGTGAAGAAAGTGTGGATTCCTT  
CAACTTGCCTCAATACCATCCATCAATTGAGGAACTAGAAATGGTGATAGA  
GATGAACAAAAGTTTTAGCCTTGAAAAAATTGGAGCATTGAATCATCCTAT  
GAAGAACTTGCCATTTGATGTTCAAATGACTTCGCTACAAGTAAGAGCTAT  
CATGGAGGGGATTCTAACCGACCATTTTGGAGACAAAATCTTGGACCAATT  
GTTGCAAATCTACACCAAGAACTGCAAGAGAATTACAATGTTTTTGACAA  
GGAAATCCGAAGAGATGCGGATTTGTTTCTTAAACGCAAGTGCAA  
TTGA

#### >HpaTDC (partial)

GAGACATTCCCTGTCTTTAGCCAAGTTGAGCCCGGATATCTCCGTACCTCTC  
AGCCCGAAACCGCCCCTTATCTGCCCGAAAAATTTGATGACATTTTGCATG  
ATATTGAAAAAGATATAATCCCTGGAATGACCAACTGGCTAAGCCCTAATT  
TTTATGCATATTTTCCAGCTACTGTTAGCTCAGCTGCTTTTCTTGGAGAAATG  
TTGTGCACCGGTTTCAACTCTGTAGGGTTCAACTGGCTAGCCTCCCCGGCA  
GCGACCGAGCTCGAGATGGTGGTGATGGATTGGCTGGCTCACATGCTTAAG  
CTCCCCAAGTCCTTTATGTTCTCAGGCACTGGTGGTGGTGTCTCCAGGGAA  
CCACCAGCGAGTCTATTCTTTGCACCCTCATCGCCGCCCCGCGACCGGGCTTT  
CGAGGAAATCGGCGTGGAGAATATTGGGAAGCTTGTTGTCTATGGATCCGA

TCAGACACATTCATTTTTTCGTCAAAACTTGCAAACTGGCAGGTATTTTCCCT  
TGCAACATAAAAAATTATCCCTACTACTGTTGAGGCCAACTTTTCCATGTCCC  
CCGGTGCTCTACGTAAACAAATCGAAGCTGACGTGGCAGATGGGCTGGTC  
CCACTTTTTGTATGTGCTACTGTGGGAACCACATCCACCCTGCCGTTGACT  
CAGTGAGTCAGATAGCTGATGTAGCAAATGAATTCAAGATGTGGATTCATG  
TTGATGCTGCTTATGCTGGTAGTGCATGCATATGTCCTGAGTTTAGGCAGTA  
CTTGATGGGGTTGAGAGAGTTGACTCAATGAGTTTCAGCCCTCATAAATG  
GCTACTTTGTTATTTGGATTGTTGTTGCTTGTGGGTCCAGAGACCTGACTTGC  
TGGTCAAGGCACTAAGTACTAACCCTGAATACTTGAAAAATAAAAGAAGT  
GAGCTTGGCTCTGTCATGGACTACAAAGACTGGCAAATTGGTACGGGAAG  
ACGATTTAGAGCACTCCGATTATGGCTTATTATGCGCAGTTACGGCCTTAA  
AAATCTCCAAAGCCACATCCGGTCCGACGTCCAAATGGCCAAAATGTTTCG  
AAGGGTTCGTGAAATCTGATCCACGGTTTGAAATGATTGTACCGCGTGCAT  
TTTCACTTGTGTGTTTTAGGCTTAATCCAAGGAGATTGGGTGAAAGTCATGC  
AATTGATTTGGAGCTCTTGAACAAGAAGCTACTCGAGTCGATCAACTCAAC  
TGGGCGAGTTTACATGACTCACACCAAGGTTGGTGGGGTATACCTGTTGAG  
ATTTGCAGTGGGGGCCCTCGTTAACAGAGGATCGCCATGTGTGTGCCGCCTG  
GGAGTTGATAAAAGAATGCACCGATAATTTGCTTAAAGAAAATAATTAG

**>HpaSGD (partial)**

GCGGCCTATCAATATGAAGGTGGAGCAAGTGAAGGCGGTAAAGGTCCCAG  
TATATGGGATACTTTCACCCATAGACGGCCTGGTTTGATAATGGGTGGAGG  
CAATGGAAACCTGGCCATTGATTCATATCATCAGTACAAGGAAGATGTCA  
AGATGTTGAAGAACATGGGGTTGGATGCCTATCGGTTTTCAATATCATGGT  
CAAGAGTCCTGCCAGGTGGGAATTTAAATGGTGGTGTAAATAAGGAAGGA  
GTTGACTACTACAACAATCTCATAGATGAGCTCCTAGACAATGGTATCGAG  
CCATATATAACTCTATTTCAATTGGGATGTTCCCCAAGCCTTGGAAGATAAAT  
ATGGTGGTTTTTTAAGTCCAAAAATTGTGGACGACTTCGTGGAGTACGTAG  
AGCTTTGCTTTTGGGAATTCGGAGATCGAGTGAAGAACTGGATAAACTGA  
ATGAACCCTGGAGCTTTAGCACTGGTGGATATGTAAACGGTACCTTTGCAC  
CCGGCCGAGGTGCCTCCGCCTCTGAGCAAGTAAATCACGATCACATTGTAC  
CAAGCAGATGTTCTGCACATGTACGACAATGTATTTCTAGCAATGGAAATC  
CAGGCACGGAGCCTTATTTGGTCACACACAATCAGCTTCTAGCCCATGCTG  
CTGCTGTAAAACTATACAAAAGCAAATTTAGAAACCACAAGAAGGCAAG  
ATTGGGATTACACTCGTGTCTCAATGGTTGGAACCATTGGATGAAAACAAT  
GATGCCGATGTCCAAGCGTCCAAAAGAGCTCTCGATTTTCATGTTAGGATGG  
TTAATGCAGCCACTTAA

**>HpaNPF2.9 (partial)**

GGCTCAAGCTTTTGTGAAACTCCATCACCTTTGCAATATACAAGCCTATTTT  
TGGCTATAGCTCTGGCAGCTTTAGGGTGTGCAGGTACTAGTTTCACTGTTCGG  
AACAAATGGGAGCAGATCAGTTGGATAATCCTGAGCATCAAGAGAATTTCTT  
TAACTGGTTTCTTTTCATCTGGGATGCTGCTTCACTGATTAGTGGTACCGTA  
ATTGTTTATGTTCAAGATAATGTGAGTTGGGGATTGGGGTATGGCCTATGTG  
GTGCCGCTAATCTGCTAGGATTAATCAGTTTTCTGCTGGGAAGGCACTACT  
ATCGCTATGTTCAACCACAAGGGAGTCCGTTCAAGGATGTAGCTCGCGTAG  
TCTTTGCAGCATTCTCTAAGAGGAAGCAATTTTGTCAAAAACAAGAGAAG  
ATTATTATAGTCCATTACATAACGAAGCCGATGACCAACATGACGGTGTCA  
ATTATTTGGCAGCAGCAGCCTCACAACCAAAAGAAACATTCAAGTTTCTGA  
ACCATGCAGCCTTGATAACCCAAGCAGACATCCAATCAGATGGATCAATC  
AGGCAATCATGGAAGTTGTGCACGGTACAACATGTGGAAGATCTTAAAC  
CTTAATTAGAATTGCCCAATTTGGGCAACTGTTATTTTCATAACCACCCCA  
ATGAGTATGCTAGCCGCCTTCACACTCCTTCAGGCTCTAAAAATGGACACT  
GGCATTGTATCCAATTTCAAATTCCCAGTAGGTTCTCTGGTAGTCTTTTTCG  
TAATCTCTGGTGCCATCTCTCTCACCATATTAGACAGATTGATATTCCCTTT  
ATGGCAAAAAATATTCGGCAAATTTCCAACACCCCTCCAACGATTAGGCA  
CAGGTCATGTCATAAATGTGCTTAGCATAGTCGTTGCAGCCTTGGTGGAAT  
CAAAGAGGCTGCAATTAGCTCGAGCCCACAATGTTCAAGATTTCGAGAATTT  
CCATCATGCCAATGTCTGTTATGTGGTTAGTACCTCAGTTGGCACTTATGGG  
AATAGGAGAAGCATTCCATTTTCCAGGACAAGC

**>HpaTHAS1 (partial)**

AAAGTTAAAGTTGGGGACGAGGTGGGAGTTGGTTGCCTCGTAGGATCATGT  
CGAAATTGTAACAGGTGCAACGAAGACCTTGAAAACACTGCCCCTGCCCA  
AATATTCACGTATGGCTCCCCAGACACCGACGGAACCCCCACATATGGAG  
GCTATTCAGATATCATGGTTGTGGACGAGCACTTCGTTGTTTCGTTGGCCTGA  
AAACTTCCCTCTTGATGCCGGTGCACCCCTTCTCTGTGCTGGAATCACTACA  
TATAGCCCGTTGAGATATTTTGGACTTGACAAACCTGGAATTCATATTGGTG  
TGGTTGGCCTTGGTGGGCTTGGTCATGTGGCCGTGAAATTCGCCAAGGCAT  
TTGGGGCAAAGGTGACCTTGATCAGCACTTCCGCTAGTAAAAAACAGGAT  
GCCATCGAAAAACTAGGGGCTGATTCATTTATACTTAGTAATGACCCTAAG  
GAAATGGAGGCTGCATTTGGAACATATGGATGGTATTATTGATACTGTCTCT  
GCTGTTCAATTCATTCTGCCTTTGATTGATTTGTTAGCATTTGATGGGAAGCT  
TGTTGAGGTTGGTATACCAGCAAAGCCACTTGAAGTGGCCATATATAACCT  
TAGCATAGGAAGGAAAATTGTGGGAGCGACTACTATTGGAGGCTTGAAGG  
AAACGCAAGAAATGATTGATTTTGCAGTAAAGCACAATATAGTACCTGAT

GTGGAGATCATCCCAATTGATTATGTGAACACCGCAATGGAGCGCCTTGAG  
AGGGGTGAAGTCAAGTACCGATTTGTGATAGATGTGGGGAATACTAAA  
GTCTACTTAG

**>HpaTHAS2 (partial)**

GGTAAAGTTGGAGATGTGGTAGGAGTGGGTTGCCTAGTTGGATCATGTTCGC  
AACTGTGACATGTGTTCCAAAGATCTCGAGAACTACTGTCCTGGGCAGATA  
CTCACATACAGCGCCGCTTATACCGATGGTACAATCACATATGGAGGCTAC  
TCTGATCTTATGGTTGCTGATGAGCACTTTGTGATCCGCTGGCCCGAGAACT  
TTCCTCTTGATGCTGGTCGTCCCCTTCTCTGTGCTGGGATCACTACTTACAGC  
CCCTTGAGATACTTTGGACTTGATAAGCCTGGAACCCATGTTGGTGTGGTTG  
GCCTTGGTGGGCTTGGTCACGTTGCTGTGAAATTTGCCAAGGCTTTTGGGGC  
AAAGGTGACTGTGATCAGTACCTCTGAGGGGAAAAAGAAGGAGGCCATTG  
AAAAACTTGGAGCAGACGCGTTCTTAAATAGCCGGGACCCTGAGCAGATG  
CAGGCTGCACGTGGTACAATAGATGGTATTATTGATACTGTTTCCGCAACA  
CATCCTGTTATTCCATTGATCAATTTGGTGAAGTCTCATGGGAAGATAATAC  
TGRRRGTTGCAGGCGAAAAGCCACTTGAGGTTCCYGCATTTCCGCTTTTGA  
TCGGGAGGAAGACGCTTACTGGGAGTGCTATTGGCAGGTCTGAAGGAAAC  
TCAGGAGATGCTGGACTTCGCAGC

### Supplementary material 3.

#### Accession numbers of amino acid sequences used for phylogenetic analysis.

##### Loganic acid O-methyltransferase (LAMT)

*Ophiorrhiza pumila* (OpuLAMT) -QWX38535.1

*Mitragyna speciosa* (MspLAMT)-[37]

*Mitragyna speciosa* (MspLAMT2)- [37]

*Catharanthus roseus* (CroLAMT)- AGX93063.1

*Uncaria tomentosa* (UtoLAMT)- QDD67562.1

##### Tryptophan decarboxylase (TDC)

*Catharanthus roseus* (CroTDC)- AYA72254.1

*Rauwolfia tetraphylla* (RteTDC)-WMM65729.1

*Rauwolfia verticillata* (RveTDC)- ABP96805.1

*Vinca minor* (VmiTDC)- AEY82397.1

*Tabernaemontana elegans* (TelTDC)- AEY82396.1

*Ophiorrhiza pumila* (OpuTDC2)- QLQ34389.1

*Mitragyna speciosa* (MspTDC)- AEQ01059.1

*Ophiorrhiza prostrata* (OprTDC)- ABU40982.1

*Ophiorrhiza pumila* (OpuTDC)- BAC41515.1

*Uncaria tomentosa* (UtoTDC)- QDD67561.1

*Uncaria guianensis* (UguTDC)- ASY03221.1

*Camptotheca acuminata* (CacTDC)- AAB39708.1

*Camptotheca acuminata* (CacTDC2)-AAB39709.1

*Uncaria rhynchophylla* (UryTDC)- [56]

##### Tetrahydroalstonine synthase (THAS)

*Uncaria tomentosa* (UtoHYS)-QDD67564.1

*Uncaria tomentosa* (UtoTHAS)- QDD67563.1

*Catharanthus roseus* (CroHYS)-ANQ45225.1

*Catharanthus roseus* (CroTHAS1)-KM524258.1

*Catharanthus roseus* (CroTHAS2)- ANQ45223.1

*Catharanthus roseus* (CroTHAS3)- ANQ45222

*Catharanthus roseus* (CroTHAS4)- KU865324

*Rauwolfia tetraphylla* (RteTHAS)-MH010799.1

*Rauwolfia tetraphylla* (Rtiso1THAS)-ASR92154.1

*Mitragyna speciosa* (MspTHAS)-WNF20697.1



*Rauvolfia tetraphylla* (RteTHAS3)- OR514625  
*Rauvolfia tetraphylla* (RteTHAS4A)- OR514623  
*Rauvolfia tetraphylla* (RteTHAS4B)- OR514624  
*Rauvolfia tetraphylla* (RteTHAS5)- OR514622  
*Rauvolfia tetraphylla* (RteYOS)- OR514626  
*Rauvolfia tetraphylla* (RteAMS)- OR514628  
*Rauvolfia tetraphylla* (MSTRG.5534)-OR514630  
*Rauvolfia tetraphylla* (MSTRG.5531)-OR514631  
*Rauvolfia tetraphylla* (MSTRG.5530)-OR514632.

### **Strictosidine beta-glucosidase (SGD)**

*Mitragyna speciosa* (MspSGD1) - WNF20694.1  
*Rauvolfia verticillata* (RveSGD)-AFI71457.1  
*Rauvolfia serpentina* (RseSGD)- CAC83098.1  
*Catharanthus roseus* (CroSGD)-AAF28800.1  
*Catharanthus roseus* (CroSGDs)- AVH80943.1  
*Uncaria tomentosa* (UtoSGD)- AFN69080.1

## Loganic acid O-methyltransferase (LAMT)

| Consensus | Sequence                                                                                                                                    | Position |
|-----------|---------------------------------------------------------------------------------------------------------------------------------------------|----------|
| CroLAMT   | -----M V A T I D S I E M-----P A L P T A V E A H P M K G G D D S H S Y S Q N S C Y Q K G V I D A A K A V I E A V N E                        | 55       |
| OpuLAMT   | -----M A P T M D N N T T T I T T V E I I K E M P E E A H P M K G G D D L N S Y S Q N S C Y Q K G V I E A A K A V I E A V H E                | 61       |
| HpaLAMT   | -----M A P T M D T I-----P T V D I K E M P E E A H P M K G G D D F N S Y S Q N S C Y Q R G V I D A A K A I F E A V N E                      | 56       |
| MspLAMT2  | M A P T V K T P T P I P T P N P N-----P S L D I K V M P E E A H P M K G G D D L N S Y S Q N S C Y Q K G V I D A A K S V I I E A V T E       | 65       |
| MspLAMT   | -----M A P T L D T I-----P T V D V K E M P E E A H P M K G G D D F N S Y S Q N S C Y Q R G V I D A A K V V I E A V N E                      | 56       |
| UtoLAMT   | -----M A P T M D T V-----P T V D V K E M P E E A H P M N G G D D L N S Y S Q N S C Y Q K G V I D A A K T V I L E A V T E                    | 56       |
| Consensus | K L D L E N N I--XX F D P S K P F R I A D F G C S T G P N T* F A M Q N I V E A V*XX K Y K S L*XX K Q P E F H V F F N D H V N D F N          |          |
| CroLAMT   | K L D L E N N I--P I F D P I K P F R I A D F G C S T G P N T F H A M Q N I V E S V E T K Y K S L Q K--T P E F H V F F N D H V N D F N       | 121      |
| OpuLAMT   | K M D L E N N I I T T F D P S K P F R I A D F G C S T G P N T F F A M Q N I V E V D N R Y K S L L K N Q Q V E F H V F F N D H A N D F N     | 131      |
| HpaLAMT   | N L E L E N N K--S T F D P S K P F R I A D F G C S T G P N T F F A M Q N I V E A V E Q K H K S L Q E K T N P E F H V F F N D H V N D F N    | 125      |
| MspLAMT2  | K L D L E N N I--T T F D P A K P F R I A D F G C S T G P N T Y F A M Q N V E A V E L K Y K S L--K K D Q P E F H V F F N D H V N D F N       | 133      |
| MspLAMT   | K L D L K N N--A N F D P S K P F H I A D F G C S T G P N T Y F A V Q N I V E A V D Q K H K S L H E K I Q P E F H V F F N D H V N D F N      | 124      |
| UtoLAMT   | K L D L E N N--A N F D P S K P F R I A D F G C S T G P N T Y F A M Q N I V E A V D Q K Y K S Q L G K S Q P E F H V F F N D H V N D F N      | 124      |
| Consensus | I L F R S L P Q N R D Y F A A G V P G S F Y T R V F P K A S L H F A H C S Y A L H W L S K V P K E I Q D K N S P A N K G R I H Y T G T E K   |          |
| CroLAMT   | V L F R S L P P N R E F F A A G V P G S F Y T R V F P K N S I H F A H C S Y A L H W L S K V P K E I Q D K N S L A Y N K G R I H Y T G T E K | 191      |
| OpuLAMT   | M L F R S L P Q N R D Y F A A G P G S F Y S R V F P K A S L H F A H C S Y A L H W L S K V P K E I Q D K N S P A Y N K G R I H Y T G T E K   | 201      |
| HpaLAMT   | I L F R S L P P N R D Y F A A G V P G S F Y T R V L P R A C L H F A H C S Y A L H W L S K V P K E V Q D K N S P A F N K G R I H Y T G T E K | 195      |
| MspLAMT2  | I L F R S L P Q N R D Y F A A G V P G S F Y T R V F P K A S L H F A H C S Y A L H W L S K V P K E I Q D K N S P A F N K G G I H Y T G T E K | 203      |
| MspLAMT   | I L F R S L P Q D R D Y F A A G V P G S F Y T R V F P K A S V H F A H C S Y A L H W L S K V P K E I Q D K N S P A F N R G R I H Y T G T E K | 194      |
| UtoLAMT   | I L F R S L P Q D R E Y F A A G V P G S F Y T R V F P K A S L H F A H C S Y A L H W L S K V P N E I Q D K N S P A Y N K G R I H Y T G T E K | 194      |
| Consensus | H V V K A Y F*Q F Q K D M*S F L K A R A Q E I V G G G L M V I Q I P G L P S G E V L F S R T G A G M L H A L L G S S L M E L V N L G*I       |          |
| CroLAMT   | H V V K A Y F G Q F Q R D F E G F L K A R A Q E I V G G G L M V I Q I P G L P S G E V L F S R T G A G L L H F L L G T S L M E L V N K G I I | 261      |
| OpuLAMT   | Q V V K A Y F S Q F Q K D L D G F L K A R A Q E I V G G G L M V I Q P L G P S G E V L F S R T G A G M L H A L L G S S L M D L V N M G I I   | 271      |
| HpaLAMT   | H V V K A Y F G Q F Q K D M A F L K A R A Q E I V G G G L M V I Q I P G L P S G E V L F S R T G A G M L H A L L G S S L M E L V T L G V I   | 265      |
| MspLAMT2  | H V V K A Y F G Q F Q K D M D S F L K A R A L E I V G G G L M V I Q P L G P S G E V L F S R T G A G L H A L L G A S L M E L V N L G V I     | 273      |
| MspLAMT   | H V V K A Y F S Q F Q K D M G S F L K A R A Q E I V G G G L M V I Q P L G P S G E V L F S R T G A G M L H A L L G S--L M D L V N L G I I    | 263      |
| UtoLAMT   | H V V K A Y F S Q F Q K D M G S F L K A R A Q E I V G G G L M V I Q I P G L P S G E V L F S R T G A G M L H A L L G S S L M E L V N L G V I | 264      |
| Consensus | *E E S V D S F N L P Q Y H P S I E E L E M V I E M N* S F T L E K*G A L N H P M K N L P F D V Q M T S L Q V R A I M E G I L T D H F G*      |          |
| CroLAMT   | N E E S V D S F N L P Q Y H P S V E D L E M V I E M N D C F T I E R V G T L P H P M K N L P F D V Q R T S L Q V R A I M E C I L T E H F G E | 331      |
| OpuLAMT   | S E E S V D S F N L P Q Y H P S I E E L E M N G S F T L E K I G A L N H P M K N L A F D A Q M T S L Q V R A I M E G I L T Q F G D           | 341      |
| HpaLAMT   | S E E S V D S F N L P Q Y H P S I E E L E M V I E M N K S F S L E K I G A L N H P M K N L P F D V Q M T S L Q V R A I M E G I L T D H F G D | 335      |
| MspLAMT2  | S E K S V D S F N L P Q Y H P S I E E L E M V I E M N S F T L E K I G A L N H P M K S L P F D V Q M T S L Q V R A I M E G I L T D H F G E   | 343      |
| MspLAMT   | T E E S V D S F N L P Q Y H P S I E E L E M V I E M N S F T I E K V G A L N H P M K N L P F D V Q M T S L Q I R A V M E G I L S D H F G G   | 333      |
| UtoLAMT   | T E E S V D S F N L P Q Y H P S I E E M E M V I E M N N F T L E K A G A L N H P M K N L P F D V Q M T S L Q V R A V M E G I L T D H F G E   | 334      |
| Consensus | K I L D Q L F E I Y T*K L Q E N Y N V F D K E I R R D A D L F L V L K R K*N                                                                 |          |
| CroLAMT   | N I L D P L F E I Y T K N L Q E N F H V F D K E I R K D A D L Y L V L K R K G N                                                             | 371      |
| OpuLAMT   | K I L D Q L F E I Y T N K L Q E N Y I V F D K E I R K D A D L F L I L K R K I N                                                             | 381      |
| HpaLAMT   | K I L D Q L F E I Y T M K L Q E N Y V F D K E I R R D A D L F L V L K R K C N                                                               | 375      |
| MspLAMT2  | K I L D Q L F E I Y T K K L Q E N Y N V F D K E I R R D A D L F L V L K R K S K                                                             | 383      |
| MspLAMT   | K I L D Q L F E I Y T T K L Q E N Y N V F D K E I R R D A D L F L V L K R K S N                                                             | 373      |
| UtoLAMT   | N I L D P L F E I Y T K K L Q E N Y N V F D K I R R D A D L F L V L K R K S N                                                               | 374      |

| Consensus |    | MGSIDXXXX-XXS SXVAFKPLXXEERFKQAHMVDFIADYYKNXEXYVPLSQVEPGYLRRLPETAP      |
|-----------|----|-------------------------------------------------------------------------|
| CroTDC    | 68 | MGSIDSTNVA--MNSNPVGEFKPLEAEERFKQAHMVDFIADYYKNVETYPVLSVEVEPGYLRKRIPETAP  |
| VmiTDC    | 70 | MGSIDSTNDVALSNGSSVGEFKPLEAEERFKQAHMVDFIADYYKNVESYPVLSQVEPGYLRERLPETAP   |
| TeiTDC    | 68 | MGSIDSTNVA--PSTPSIAEFKPLDAEERFKQAHMVDFIADYYKNVENYPVLSQVEPGYLRERLPENAP   |
| RveTDC    | 68 | MGSIDSTDVA--ISASPAVEFKPLEAEERFKQAHMVDFIADYYKNVESYPVLSQVEPGYLRERLPETPP   |
| RteTDC    | 68 | MGSIDSTDVA--FSASAVAEFKPLEAEERFKQAHMVDFIADYYKNVESYPVLSQVEPGYLRERLPESPP   |
| CacTDC    | 68 | MGSIDSNYD--TESPASVGGFNLPDPEERFKQAHMVDFIADYYKNIESYPVLSQVDPGVRHSRLGKNAP   |
| CacTDC2   | 65 | MGSIDSNVA--PSTPSIAEFKPLDAEERFKQAHMVDFIADYYKNIESYPVLSQVEPGYLRERLPETAP    |
| OpuTDC    | 67 | MGSISENC---DDISISLAAPFRPLEPEERFKQAHMVDFIADYYKNINENYPVLSQVEPGYLRNRLPETAP |
| OprTDC    | 67 | MGSISENC---DDISISLAAPFRPLEPEERFKQAHMVDFIADYYKNINENYPVLSQVEPGYLRNRLPETAP |
| HpaTDC    | 23 | -----ETFPVFSQVEPGYLRTSQPETAP                                            |
| OpuTDC2   | 70 | MGSIDANNINGAYPSSSPVAPFKPLDPEERFKQAHMVDFIADYYKNIEKYPVLSQVEPGYLRTRLPETAP  |
| UtoTDC    | 22 | -----RQPVLSQVEPGYLRKHLPETAP                                             |
| MspTDC    | 69 | MGSIDTSDGDAYANSAPVAFKPLDPEERFKQAHMVDFIADYYKNINENYPVLSQVEPGYLRQLSQTAP    |
| UryTDC    | 69 | MGSIDTNDDAAYANSAPVAFKPLDPEERFKQAHMVDFIADYYKNINENYPVLSQVEPGYLRARLPETAP   |
| UguTDC    |    | -----                                                                   |
| Consensus |    | YLPExFEXILDIQKDIIPGMTNWLSPNFFAFPATVSSAAFLGEMLCTFNSVGFNWLASPAATELEMV     |
| CroTDC    | 13 | YLPPELDDIMKDIQKDIIPGMTNWMSPNFFAFFPATVSSAAFLGEMLSTALNSVGFTWVSSPAATELEMI  |
| VmiTDC    | 14 | YLPESLDKIMSDIQKDIIPGMTHWMSPNFFAFFPATVSSAAFLGEMLSTALNSVGFTWVSSPAATELEMI  |
| TeiTDC    | 13 | YLPESLDMIINDIQKDIMPGMTNWMSPNFFAFFPATVSSAAFLGEMLSTALNSVGFTWVSSPAATELEMI  |
| RveTDC    | 13 | YLPDSLDKIIDDIQKDIIPGMTNWMSPNFFAFFPATVSSAAFLGEMLSTALNSVGFTWVSSPAATELEMI  |
| RteTDC    | 13 | HLPESLDKIIDEIQKDIIPGMTNWMSPNFFAFFPATVSSAAFLGEMLSTALNSVGFTWVSSPAATELEMI  |
| CacTDC    | 13 | YRSEPFESILKDVQKDIIPGMTHWMSPNFFAFFPATVSSAAFLGEMLCTCFNSVGFNWLASPAATELEMV  |
| CacTDC2   | 13 | YRPEPFESILKDVHKDIIPGVTHWLSPNFFAFFPATVSSAAFLGEMLCTCFNAVGFNWLASPAATELEMV  |
| OpuTDC    | 13 | HLPESEFETILKDIKKDIVPGMTNWLSPNFFAFFPATVSSAAFLGEMLCTGFNSVGFNWLASPAATELEMV |
| OprTDC    | 13 | HLPESEFETILKDIKKDIVPGMTNWLSPNFFAFFPATVSSAAFLGEMLCTGFNSVGFNWLASPAATELEMV |
| HpaTDC    | 93 | YLPEKFDLILHDIEKDIIPGMTNWLSPNFFAFFPATVSSAAFLGEMLCTGFNSVGFNWLASPAATELEMV  |
| OpuTDC2   | 14 | YLPEPFENILQDIQKDIIPGMTNWLSPNFFAFFPATVSSAAFLGEMLCTGFNSVGFNWLASPAATELEMV  |
| UtoTDC    | 92 | YLPEPFENILHDIEKDIIPGMTNWLSPNFFAFFPATVSSAGFLGEMLCTGFNSVGFNWLASPAATELEMV  |
| MspTDC    | 13 | YLPEPFENILQDIQKDIIPGMTNWLSPNFFAFFPATVSSAAFLGEMLCTGFNSVGFNWLASPAATELEMV  |
| UryTDC    | 13 | YLPEPFENIMQDIHKDIIPGMTNWLSPNFFAFFPATVSSAAFLGEMLCTGFNSVGFNWLASPAATELEMI  |
| UguTDC    |    | -----                                                                   |
| Consensus |    | VMDWLA MLKLPKFSMFSGTGGGVIQGTTSEAILCTLIAARDRALEKXGVXNIGKLVVYGSQDQTHSFXK  |
| CroTDC    | 20 | VMDWLAQILKLPKFSMFSGTGGGVIQNTTSEILCTIIAARERALEKLGPD SIGKLVCYGSQDQTHMFPK  |
| VmiTDC    | 21 | VMDWLAKMLKLPKFSMFSGTGGGVIQNTTSEILCTIIAARERALEKLGPD SIGKLVCYGSQDQTHMFPK  |
| TeiTDC    | 20 | VMDWFAQMLKLPKFSMFSGTGGGVIQNTTSEILCTIIAARERALEKLGPD SIGKLVCYGSQDQTHMFPK  |
| RveTDC    | 20 | VMDWLAQMLKLPKFSMFSGTGGGVIQNTTSEILCTIIAARERALEELGVD SIGKLVCYGSQDQTHMFPK  |
| RteTDC    | 20 | VMDWLAQMLKLPKFSMFSGTGGGVIQNTTSEILCTIIAARERALEELGVD SIGKLVCYGSQDQTHMFPK  |
| CacTDC    | 20 | VIDLWANMLKLPKFSMFSGTGGGVILQGTTSAILCTLIAASPMHFEIVGVKTSFVVYGSQDQTHSTYAK   |
| CacTDC2   | 20 | VMDWLASMLKLPKNSFTFLGTGGGVIQGTTSEAILCTLIAARDRALESGVDSIHKLVVYGSQDQTHSTYAK |
| OpuTDC    | 16 | VIDLWANMLKLPKFSMFHGTGGGVILQGTTSAILCTLIAARDGALEKIGMENVGKLVVYGSQDQTHSFFQK |
| OprTDC    | 16 | VIDLWANMLKLPKFSMFHGTGGGVILQGTTSAILCTLIAARDGALEKIGMENVGKLVVYGSQDQTHSFFQK |
| HpaTDC    | 21 | VMDWLAHMLKLPKFSMFSGTGGGVILQGTTSAILCTLIAARDRAFEIIGVENIGKLVVYGSQDQTHSFFHK |
| OpuTDC2   | 16 | VIDLWANMLKLPKFSMFSGTGGGVILQGTTSAILCTLIAARDHVLNKIGVKNIGKLVVYGSQDQTHFFIK  |
| UtoTDC    | 16 | VMDWLADMLKLPKFSMFSGTGGGVILQGTTSAILCTLIAARDRAFEIIGVENIGKLVVYASDQTHSFFVK  |
| MspTDC    | 20 | VMDWLANMLKLPKFSMFSGTGGGVILQGTTSAILCTLIAARDRAFEIIGVENIGKLVVYASDQTHSFFVK  |
| UryTDC    | 20 | VMDWMANMLDLPKFSMFSGTGGGVILQGTTSAILCTLIAARDRAFEKFGADNIGKLVVYASDQTHSFFVK  |
| UguTDC    |    | -----                                                                   |

| Consensus | TCKLAGIFPCNIR×IPTT×E×NFSMSP×ALR×QIEADVA×GLVPLFLCATVGGTSTTAIDPVS×LA×VAN  |     |
|-----------|-------------------------------------------------------------------------|-----|
| CroTDC    | TCKLAGIYPNNIRLIPPTTETDFGISPQVLRKMVEDDVAAGYVPLFLCATLGTTSTTATDPVDSLSEIAN  | 278 |
| VmiTDC    | TCKLAGIFPDNIRLIPPTLETDFSIDPHVLRVMKADVADAGLIPLFLCATLGTTSTTATDPVSSLSEITN  | 280 |
| TelTDC    | TCRLAGIFPSNIRLVPPTAETDFSIAPEVLRKMVEADVAAGLTPLFLCATLGTTSTTATDPVNALAEIAN  | 278 |
| RveTDC    | TCKLAGISPKNIRLIPPTAETDFGIAPEVLRGMVEADIAAGLVPLFLCATLGTTSSSTATDPVDSLSEIAN | 278 |
| RteTDC    | TCKLAGISPNNIRLVPPTAETDFGIAPEVLRRMVEADVAAGLVPLFLCATLGTTSSSTATDPVDTLSEIAN | 278 |
| CacTDC    | ACKLAGILPCNIRSIPTTADSNFSVSPLLRRRAIEADKAAGMVPLYICATVGGTSTTAIDPLSSLADVAN  | 278 |
| CacTDC2   | ACNLAGILPCNIRSIRTEAVANFSLSPDSLHREIEADVAAGMVPLYLCATVGGTSTTAIDSLSPADVAN   | 275 |
| OpuTDC    | TCKVAGIFPCNIKLIPTTREDNFSMSPIALREQIEADVADGLVPIFLCTTVGGTSTAAIDPVSEVAKVAN  | 277 |
| OprTDC    | TCKVAGIFPCNIKLIPTTREDNFSMSPIALREQIEADVADGLVPIFLCATVGGTSTAAIDPVSEVAKVAN  | 277 |
| HpaTDC    | TCKLAGIFPCNIKLIPTTVEANFSMSPGALRKQIEADVADGLVPLFVCATVGGTSTTAVDSVSQLADVAN  | 233 |
| OpuTDC2   | TCKLAGIFPCNIKLIPTTSEANFSMSPHALRKQIESDVAGGLVPIFLCATIGTTSTTAIDPVSGLAKVAN  | 280 |
| UtoTDC    | TCKLAGIFPCNIRIIPTTAEANFSMSPVALRQQIEADAADGLVPLFLCATVGGTSTTAVDPVSQLAHVAN  | 232 |
| MspTDC    | TCKLAGIFPCNIRIIPTTADDNFSMSPDALRKQIEADVEDGLVPLFICATVGGTSTTAIDPVSELADVAN  | 279 |
| UryTDC    | TCKLAGIFPRNIRIIPTTVENYFSMSPEAVRKQIQADVENGVLVPLFLCATVGGTSTTAIDSVSQLADIAN | 279 |
| UguTDC    | -----MSPEAVRKQIQADVKNGLIPLFLCATVGGTSTTAIDSVSQLADIAN                     | 46  |

| Consensus | EFN×WIHVDAAYAGSACICPEFR×YLDGIERVDSLSLSPHKWLL×YLDCCCLWVKKP×LLVKAL×TNPEY  |     |
|-----------|-------------------------------------------------------------------------|-----|
| CroTDC    | EFGIWIHVDAAYAGSACICPEFRHYLDGIERVDSLSLSPHKWLLAYLDCTCLWVKQPHLLLRALTNNPEY  | 348 |
| VmiTDC    | EFNIWMHVDAAYAGSACICPEFRHYLDGIERVDSLSLSPHKWLLAYLDSTCLWVKNNPNNLLRALTNNPEY | 350 |
| TelTDC    | EFDIWIHVDAAYAGSACICPEFRHYLDGIERVDSLSISPHKWFLAYLDCTCLWVKKPQLLLRALTNNPEY  | 348 |
| RveTDC    | EFNIWMHVDAAYAGSACICPEFRHYLDGIERVDSLSISPHKWLLAYLDCTCLWVKKPHFILRALTNNPEY  | 348 |
| RteTDC    | EFNIWMHVDAAYAGSACICPEFRHYLDGVERVDSLSLSPHKWLLAYLDCTCLWVKKPYLLLRALTNNPEY  | 348 |
| CacTDC    | DYGVWFHVDAAYAGSACICPEFRHYLDGIERADSLSLSPHKWLLSYLDCCCLWVKSPSLLVKALSTDPEY  | 348 |
| CacTDC2   | DYGLWFHVDAAYAGSACICPEFRHYLDGIERADSLSLSPHKWLLSYLDCCCLWVKRPSVLVKALSTDPEY  | 345 |
| OpuTDC    | DFNIWMHVDAAYAGSACICPEFRQYLDGIELVDSFSLSPHKWLLCFLDCCCLWLKKPHLMVKALSTNPEY  | 347 |
| OprTDC    | DFNIWMHVDAAYAGSACICPEFRQYLDGIELVDSISLSPHKWLLCFLDCCCLWLKKPHLMVKALSTNPEY  | 347 |
| HpaTDC    | EFKMWIHVDAAYAGSACICPEFRQYLDGVERVDSMSFSPHKWLLCYLDCCCLWVQRPDLLVKALSTNPEY  | 303 |
| OpuTDC2   | DFSVWIHVDAAYAGSACICPEFRKYLDGVELVDSLSLSPHKWLLCYLDCCCLWVKKPALMVKALSTNPEY  | 350 |
| UtoTDC    | EFNVWIHVDAAYAGSACICPEFRQYLDGIERADSLSLSPHKWLLCYLDCCCLWVKKPDLMVKALSTNPEY  | 302 |
| MspTDC    | DFNVWIHVDAAYAGSACICPEFRQYLDGIERVDSLSLSPHKWLLCYLDCCCLWVKKTDLLVKALATNPEY  | 349 |
| UryTDC    | EFNVWIHVDAAYAGSACICPEFRQYLEGVERVDSLSLSPHKWLLCYLDCCCLWVKKTDLLVKALATNPEY  | 349 |
| UguTDC    | EFNVWIHVDAAYAGSACICPEFRQYLEGVERVDSLSLSPHKWL-----                        | 89  |

| Consensus | LKNK×SE×D×VVDFKDWQIGTGR×FRALRLWL×MRSYGV×NLQSHIRSDV×MAKMFEFV×SDPRFE×VV  |     |
|-----------|------------------------------------------------------------------------|-----|
| CroTDC    | LKNKQSDLDKVVDFKNWQIATGRKFRLSLKLWLILRSYGVVNLQSHIRSDVAMAKMFEFVRSRFEIIV   | 418 |
| VmiTDC    | LKNKQSDLDKVVDFKNWQIATGRKFRLSLKLWLILRSYGVANLQTHIRSDVAMAKMFEFVRSRPFEEVV  | 420 |
| TelTDC    | LKNKQSELDKVVDFKNWQIATGRKFRLKLWFLILRSYGVANLQSHIRSDVAMAKMFEFVRSRPFEEVV   | 418 |
| RveTDC    | LKNKQSELDKVVDFKNWQIATGRKFRLKLWILILRSYGVSNLQSHIRSDVAMAKMFEDFARSRPFEEVV  | 418 |
| RteTDC    | LKNKQSELDKVVDFKNWQIATGRKFRLKLWILILRSYGVENLQSHIRSDVAMAKMFEDFVRSRPFEEVV  | 418 |
| CacTDC    | LKNQPSSEKSVVDYKDWQVGTGRRFKALRLWFMRSYGVANLQSHIRTDVQMAKMFEFVKS DPRFEILV  | 418 |
| CacTDC2   | LKNKPSSESNVVDYKDWQVGTGRRFKALRLWFMRSYGVANLQSHIRSDIQMAKMFEFVNS DPRFEIIV  | 415 |
| OpuTDC    | LRNKRSEFDGVDFKDWQIGTGRRFKALRLWLMRSYGVENLKRHILSDVQMAKMFEGLVKS DPRFEIIV  | 417 |
| OprTDC    | LRNKRSEFDGVDFKDWQIGTGRRFKALRLWLMRSYGVENLKRHILSDVQMAKMFEGLVKS DPRFEIIV  | 417 |
| HpaTDC    | LKNKRSELGSVMDYKDWQIGTGRRFRALRLWLIMRSYGLKNLQSHIRSDVQMAKMFEFVKS DPRFEMIV | 373 |
| OpuTDC2   | LRNKRSEFDSVVDYKDWQIGTGRRFRALRLWLIMRSYGVANLQRHIRSDVEMAKMFEFVKS DPRFEEVV | 420 |
| UtoTDC    | LRNKRSEFDSVMDYKDWQV-----                                               | 321 |
| MspTDC    | LRNKRSEFDSVVDYKDWQIGTGRRFRALRLWLMRCYRVANLQSHIRSDVQMAKMFEFVKS DPRFEMIV  | 419 |
| UryTDC    | LRNKRSEFDSVVDYKDWQIGTGKFRSLRLWLVMRCYGVANLQSHIRSDVQMAKMFEFVKS DPRFEIIV  | 419 |
| UguTDC    | -----                                                                  | 89  |

| Consensus | PR×FSLVCFRLNP××-G×××××D×E×LNKKLLD××NSTGRVYMTHTKVGGIYMLRFAVG××LTEE×HV×A   |     |
|-----------|--------------------------------------------------------------------------|-----|
| CroTDC    | PRNFSLVCFRLKPDVSS----LHVEEVNKKLLDMLNSTGRVYMTHTIVGGIYMLRLAVGSSLTEEHHVRR   | 484 |
| VmiTDC    | PRNFSLVCFRLKPLP-G----SDVEILNKKLLNDMLNSTGRVYMTHTIVGGIYMLRLAVGSSLTEEHHVRA  | 485 |
| TeiTDC    | PRAFSLVCFRLKPPF-G----SDVEALNKKLLDKLNSTGRVYMTHTIVGGIYMLRLAVGSSLTEEHHVRA   | 483 |
| RveTDC    | PRNFSLVCFRLKALP-G----SDVEALNKKLLDMLNSTGRVYMTHTIVGGIYMLRLAVGSSLTEEHHVRA   | 483 |
| RteTDC    | PRNFSLVCFRLKALP-G----SDVETLNKKLLDMLNSTGRVYMTHTIVGGIYMLRLAVGSSLTEEHHVRS   | 483 |
| CacTDC    | PRVFSLVCFRLNPIS--GSDPTGTEALNRKKLLDWVNSTGRVYMTHTKVGGIYMLRFAVGATLTEKRHVSS  | 486 |
| CacTDC2   | PRVFSLVCFRLNPFPS--KSDPCNTELLNRKKLLEWVNSTGQVYIHTTKVGGVYMLRFAVGATLTEEHHVSA | 483 |
| OpuTDC    | PRAFALVCFRLNPGK-GYDDEIDKEILNKKELLDLINSTGRAYMTHTKAGGIYMLRFAVGTTLTEEHHVYA  | 486 |
| OprTDC    | PRAFALVCFRLNPGK-GYDDEIDKEILNKKELLDLINSTGRAYMTHTKAGGIYMLRFAVGTTLTEEHHVYA  | 486 |
| HpaTDC    | PRAFSLVCFRLNPRRLGESHAIDLELLNKKLLESINSTGRVYMTHTKVGGVYLLRFAVGASLTEDRHVCA   | 443 |
| OpuTDC2   | PRTFSLVCFRLNPFGRSNNATYVELLNEKKLLDLVNSTGRAYMTHTKVGGVYMLRFAVGATLTEERHVNA   | 489 |
| UtoTDC    | -----                                                                    | 321 |
| MspTDC    | PRAFSLVCFRLNPSG-GSNEA-DLELLNKKLLDRVNSTGRTYMTHTKAGEVYLLRFAVGATLTEDRHVYA   | 487 |
| UryTDC    | PRAFSLVCFRLNPSE-GSSEA-HLELLNKKLLERVNSTGRAYMTHTKAGEVYLLRFAVGATLTEDRHVYA   | 487 |
| UguTDC    | -----                                                                    | 89  |

| Consensus | AWELIKE××D×LLKE×-----       |     |
|-----------|-----------------------------|-----|
| CroTDC    | VWDLIQKLTDDLKEA-----        | 500 |
| VmiTDC    | VWELIKKLADDLLKEA-----       | 501 |
| TeiTDC    | VWELIKELANDSLKEA-----       | 499 |
| RveTDC    | VWELIKELANDLLKEA-----       | 499 |
| RteTDC    | VWELIKELTSDLLKEA-----       | 499 |
| CacTDC    | AWKLIKEGADVLLKED-----       | 502 |
| CacTDC2   | AWKLIREGADALLCS-----        | 498 |
| OpuTDC    | AWELIKECTDASLTKTNIIE-----   | 506 |
| OprTDC    | AWELIKECTDASLTKTNIIESRANPQ  | 512 |
| HpaTDC    | AWELIKECTDNLLKENN*-----     | 461 |
| OpuTDC2   | AWELIKECTAALLKENNHQCIDI---- | 511 |
| UtoTDC    | -----                       | 321 |
| MspTDC    | AWELIKQCADAVLLKENVLD-----   | 506 |
| UryTDC    | AWELIKACADAVIKENLLD*-----   | 507 |
| UguTDC    | -----                       | 89  |

# Strictosidine beta-glucosidase (SGD)

|                                                                                      |                                                                            |
|--------------------------------------------------------------------------------------|----------------------------------------------------------------------------|
|    |                                                                            |
| Consensus                                                                            | MXXXXXXXXLVVAIXXXXXXXXXX-----XXXXXPKXXKXXVHRRDFPXDFFFGAGGSAYQCEGAY         |
| UtoSGD                                                                               | -----MSTPATKFSGTVSRSDFPPEGFLFGSASSAFQYEGAH36                               |
| HpaSGD                                                                               | -----AAYQYEGGA9                                                            |
| MspSGD1                                                                              | -----MEAQRTATVVSNDASKINRGDFAEDFIFGAASSAYQTEGGA41                           |
| CroshSGD                                                                             | MGSKDDQSLVVAISPAAEPNGNHSVIPFAYPSIPIQPRKHNKPIVHRRDFPSDFILGAGGSAYQCEGAY70    |
| CroSGD                                                                               | MGSKDDQSLVVAISPAAEPNGNHSVIPFAYPSIPIQPRKHNKPIVHRRDFPSDFILGAGGSAYQCEGAY70    |
| RseSGD                                                                               | MDNTQAEP LVVAIVPKPNASTEHT-----NSHLIPVTRSKIVVHRRDFPQDFIFGAGGSAYQCEGAY62     |
| RveSGD                                                                               | MESNQGEPL LVVAIVPKPNASTEQK-----NSHLIPATRSKIVVHRRDFPQDFVFGAGGSAYQCEGAY62    |
|    |                                                                            |
| Consensus                                                                            | NEGNRGPSIWDFTFXRPAKIXDGSNGNQAINSYHXKEDIKIMKQXGLEXYRFSISWSRVLPGGNLX--       |
| UtoSGD                                                                               | NVDGRLPSIWDFTFLVETHPDIV-AANGLDAVEFYRYKEDIKAMKDIGLDTFRFSLSWPRILPNGRRTRG105  |
| HpaSGD                                                                               | SEGGKGPSIWDFTTHRRPGLIMGGGNGNLAIDSYHQYKEDVKMLKNMGLDAYRFSISWSRVLPGGNLN--77   |
| MspSGD1                                                                              | SEGGKGPSIWDFTTQRRPGMIKEGGNGNMAVDSYHQYKEDVKILKNMGLDAYRFSISWSRVLPGGNLN--109  |
| CroshSGD                                                                             | NEGNRGPSIWDFTFNRYPAKIADGSNGNQAINSYNLYKEDIKIMKQTGLESYRFSISWSRVLPGGNLS--138  |
| CroSGD                                                                               | NEGNRGPSIWDFTFNRYPAKIADGSNGNQAINSYNLYKEDIKIMKQTGLESYRFSISWSRVLPGGNLS--138  |
| RseSGD                                                                               | NEGNRGPSIWDFTTQRSPAKISDGSNGNQAINCYHMYKEDIKIMKQTGLESYRFSISWSRVLPGGRLA--130  |
| RveSGD                                                                               | NEGNRGPSIWDFTTQRTPAKISDGSNGNQAINCYHMYKEDIKIMKQAGLEAYRFSISWSRVLPGGRLA--130  |
|    |                                                                            |
| Consensus                                                                            | -----XGVNKDGVKFYHDFIDELLANGIKPXXTLFHWDLPPQALEDEYGGFLSXRIVDFFXEYAEFCFWEF    |
| UtoSGD                                                                               | PNNEEQGVNKLAIIDFYNKVINLLENGIEPSVTLFHWDPVQALETEYLGFLSEKSVEDFVDYADLCFREF175  |
| HpaSGD                                                                               | -----GGVNKEGVYYNNLIDELLNGIEPYITLFHWDPVQALEDKYGGFLSPKIVDDFVEYVELCFWEF142    |
| MspSGD1                                                                              | -----AGVNKEGINYYNNLIDELLANGIEPYVTLFHWDPVQALEDKYGGFLSPQIVDDFREYVELCFWEF174  |
| CroshSGD                                                                             | -----GGVNKDGVKFYHDFIDELLANGIKPFATLFHWDLPPQALEDEYGGFLSDRIVEDFTEYAEFCFWEF203 |
| CroSGD                                                                               | -----GGVNKDGVKFYHDFIDELLANGIKPFATLFHWDLPPQALEDEYGGFLSDRIVEDFTEYAEFCFWEF203 |
| RseSGD                                                                               | -----AGVNKDGVKFYHDFIDELLANGIKPSVTLFHWDLPPQALEDEYGGFLSHRIVDDFCEYAEFCFWEF195 |
| RveSGD                                                                               | -----AGVNKDGVKFYHDFIDELLANGIKPFATLFHWDLPPQALEDEYGGFLSHRIVDDFCEYAEFCFWEF195 |
|  |                                                                            |
| Consensus                                                                            | GDKVKXWTTFNEPHTFXXXGYAXGEFAPGRGXXX-----XXGXPGTGE                           |
| UtoSGD                                                                               | GDRVKYWMTFNETWSYSLFGYLLGTFAFGRGSTNEEQRKAIAEDLPSSLGKSRQAFASRTPRAGDPSTE245   |
| HpaSGD                                                                               | GDRVKNWITLNEPWSFSTGGYVNGTFAPGRGASASEQV-NHDHIVPSRCS---AHVRQCISSNGNPSTE207   |
| MspSGD1                                                                              | GDRVKHWITLNEPWSFVGGYVNGTFAPGRGASSDQENDHPAALPSRCS---PWQSQSISSNGNPSTE240     |
| CroshSGD                                                                             | GDKVKFWTTFNEPHTYVASGYATGEFAPGRGGAD-----GKGNPGKE245                         |
| CroSGD                                                                               | GDKVKFWTTFNEPHTYVASGYATGEFAPGRGGAD-----GKGEPPKE245                         |
| RseSGD                                                                               | GDKIKYWTTFNEPHTFAVNGYALGEFAPGRGGKG-----DEGDPAIE237                         |
| RveSGD                                                                               | GDKIKYWTTFNEPHTFTANGYALGEFAPGRGKNG-----KGDPATE236                          |
|  |                                                                            |
| Consensus                                                                            | PYXVTHNXXLLAHKAAVEXYRXXFQK---CQXGEIGIVLNSXWMEPLNEX-ADIDAXXKRALDFMLGWFXE    |
| UtoSGD                                                                               | PYIVTHNQLLAHAAAVKLYRFAYQNAQNAQKGKIGIGLVSIWAEPHNDT-TEDRDAARQLDFMLGWLFQ314   |
| HpaSGD                                                                               | PYLVTHNQLLAHAAAVKLYKSKFQK---PQEGKIGITLVSQWLEPLDENNDADVQASKRALDFMLGWLQ274   |
| MspSGD1                                                                              | PYVVTHNQLLAHAAAVELYKSNFQK---SQNGKIGITLVSQWMEPLDENSKADVEAAKRALDFMLGWFM2307  |
| CroshSGD                                                                             | PYIATHNLLLSHKAAAEVYRKNFQK---CQGGIEIGIVLNSMWMEPLNET-KEDIDARERGLDFMLGWFI2311 |
| CroSGD                                                                               | PYIATHNLLLSHKAAAEVYRKNFQK---CQGGIEIGIVLNSMWMEPLNET-KEDIDARERGLDFMLGWFI2311 |
| RseSGD                                                                               | PYVVTNILLAHKAAVEEYRNKFQK---CQEGIEIGIVLNSMWMEPLSDV-QADIDAQKRALDFMLGWFL2303  |
| RveSGD                                                                               | PYLVTHNILLAHKAAAEAYRNKFQK---CQEGIEIGIVLNSTWMEPLNDV-QADIDAHKRALDFMLGWFI2302 |

**YpkA**

Consensus: PLTTGYPKSMRVLGRLPFSXSEKLGCYDFIGMNYTXYVNAKXS--XXXXYETDXXX--X

UtoSGD 373  
HpaSGD 276  
MspSGD1 375  
CroshSGD 379  
CroSGD 379  
RseSGD 371  
RveSGD 370

**YpkB**

Consensus: FXXXXDXXVPIGXXYGWQHVPVGLYKLLVYTKEYHVPVIYVTEGXVEENXTXI-----L

UtoSGD 431  
HpaSGD 276  
MspSGD1 433  
CroshSGD 449  
CroSGD 449  
RseSGD 428  
RveSGD 431

**YpkC**

Consensus: LEARDXRXDYQXHLASVRDAIXDGVNVKGYFVWSFDNFEWXXGXXRXG IHVDYXFXRYPKX

UtoSGD 501  
HpaSGD 276  
MspSGD1 503  
CroshSGD 475  
CroSGD 518  
RseSGD 497  
RveSGD 500

**YpkD**

Consensus: SAIWKNFXXXXXXXXX-XXXXXXXXX-LVKXXXXX-----

UtoSGD 553  
HpaSGD 276  
MspSGD1 539  
CroshSGD 475  
CroSGD 555  
RseSGD 532  
RveSGD 536

[illegible]



|                    |                                                                                    |     |
|--------------------|------------------------------------------------------------------------------------|-----|
|                    |  |     |
| <b>Consensus</b>   | <b>CXXXEXYCPXXXXTDGXXXXDG-----XXYGGXSNIMVXXEXFVVRWPENLPLDGV</b>                    |     |
| RteTHAS5           | -----PMGAYAEEQILPADRAVPVPSPSIDPIVGA                                                | 119 |
| CroTHAS2           | CNEGLEPYCPKVIYTDGTAFSDENNTVYGDVSGD---GEDRIYGGYSNIMVANEYVVRWPENLPLAAGV              | 173 |
| CroTHAS3           | CKEGEDSYCPSLITGDGTSFSDGNDVFFYDPNDNTKETTKTYGSYSNFTVVDEYYVIRWPENFPLAAGV              | 179 |
| RteTHAS2           | CKEGLDSYCPNLITGDGTSFSDGNDLYFHDPNDTE---SKIYGGFSNITVVEEYVVRWPENFPLAAGV               | 173 |
| RteTHAS            | CKEGFDSYCPNLITADGTSFSDGNDIYFHDPNDTE---SKIYGGFSNITVVDEYYVVRWPENFPLAAGV              | 173 |
| RteTHAS3           | CKEGFDSYCPNLITADGTSFSDGNDLYFHDPNDTE---SKIYGGFSNITVVDEYYVVRWPENFPLAAGV              | 173 |
| RteTHAS4A          | CADEVEQYCPKAVATDG---FMG-----SGQYGACSDIMVADEDFLLVLPENLPLDSGV                        | 191 |
| RteTHAS4B          | CANEVEQYCPKAVATDG---FMG-----SGQYGSCSDIMVADEDFLLVLPENLPLDCGV                        | 160 |
| CroTHAS1           | CTNEVENYCPPEAGSIDS-----NYGACSNIAVINENFVIRWPENLPLDSGV                               | 158 |
| RteYOS             | CTNEVENYCPKAVSIDS---NFA-----N-NYGGCSNIMVTKENFVIHWPENLPLDSGV                        | 159 |
| RteAMS             | CIIQAENNCPKLESTDG---HFG-----T-NYGGCSNIMVNEKFFVVLWPENLPPDSGV                        | 163 |
| CroHYS             | CVNGVENNCSKVESTDG---HFG-----N-NFGGCCNIMVNEKYAVVWPENLPLHSGV                         | 159 |
| CroTHAS4           | CINGVENNCPEAESTDG---FSG-----K-NFGGCCNIMVNEKYAVVWPENLPLHSGV                         | 159 |
| UtoHYS             | -----                                                                              |     |
| UtoTHAS            | CTNDLENYCPKAVLTE-----ATSGGCSNFVVADEDFVFRWPEKLPDLGA                                 | 68  |
| MspTHAS            | CSNDLEPYCPKMMMTYNSIDEDG-----IPTRGGFSNEMVNEHFVVRWPDNLPLDGGV                         | 180 |
| MSTRG5530(Rte-YOS) | CSADLENYCPKQVPTYSMPIYFDG-----TITYGGYSNEMVCNEHFIRFPNKIPLDAGA                        | 163 |
| MSTRG5531(Rte-YOS) | CRADMESYCPKMVMMAHGSPNFDG-----TITYGGFSNEMVLNEHFVIRYDPNLPLAAGA                       | 163 |
| HpaTHAS2           | CSKDLENYCPGQILTYSAAYTDG-----TITYGGYSNEMVNEKFFVIRWPENFPLDAGR                        | 75  |
| HpaTHAS            | CNEDLENYCPAQIFTYGSPTDG-----TPTYGGYSNIMVNEKFFVVRWPENFPLDAGA                         | 76  |
| MSTRG5534(Rte-YOS) | CSNDLENYCPGQILTYSATNTDG-----TTTYGGYSNIMVNEKFFVIRWPENLPLMDIGA                       | 162 |
|                    |  |     |
| <b>Consensus</b>   | <b>PLLCAGITXYSPM-RXFGLDKPGHXGVGLGGLGHXAVKFAKAFGAKVTVISSSXXKKXEAIEXGADX</b>         |     |
| RteTHAS5           | SILLKGHTAQFLVRHCFKVECGHTVLVHAAAGGVGSLLCQWANALGATVIGTVSTKEAAQ-AKDDGCHH              | 188 |
| CroTHAS2           | PILCGGIVPYSPM-RHFGLDKPGLSIGVVGFGGRIGKLAVKFAKAFGANVTVISTISIKKQEAIEKYGVDR            | 242 |
| CroTHAS3           | PLLCAGTVPYSPM-RHFGFDKPGIHHIGVVGGGIGKLVVKFAKAFGVKVTVISTSIDKKHEAIEHYGAHG             | 248 |
| RteTHAS2           | PVLCAGTVPYSPM-RCFGFDKPEIHLGVVGLGGIGRLTVKFAKAFGAKVTVISTSIDKKQEAIEKYGADS             | 242 |
| RteTHAS            | PLLCAGTVPYSPM-RCFGFDKPEIHLGVVGLGGIGKLTVKFAKAFGAKVTVISTSIDKKQEAIEKYGADR             | 242 |
| RteTHAS3           | PLLCAGTVPYSPM-RCFGFDKAEIHLGVVGLGGIGKLTVKFAKAFGAKVTVISTSIDKKQEAIEKYGADR             | 242 |
| RteTHAS4A          | PLLC-GVTIYSPM-RRFGLDKPGTHIGIAGLGGFGHMAVRFKAFAGTQVTVISSSAKKKRETLEKFGADS             | 259 |
| RteTHAS4B          | PLLC-GVTIYSPM-RRFGLDKPGTHIGIAGLGGFGHMAVRFANAFGTQVTVISSSAKKKRETLEKFGADS             | 228 |
| CroTHAS1           | PLLCAGITAYSPM-KRYGLDKPGKRIGIAGLGGGLGHVALRFKAFGAKVTVISSSLKKKREAFKFGADS              | 227 |
| RteYOS             | PLLCAGINAYSPM-RRYGLDKTGMRVGIAGLGGGLGHVGVRFKAFGAKVTVISSSLKKKHEALEKFGADS             | 228 |
| RteAMS             | PLLCAGITTYSPM-RRYGLDKPGMRVGIAGLGGGLGHLAVRFKAFAGANVTVISSSLEKKREALEKFGADS            | 232 |
| CroHYS             | PLLCAGITTYSPL-RRYGLDKPGLNIGIAGLGGGLGHLAIRFAKAFGAKVTLISSSVKKKREALEKFGVDS            | 228 |
| CroTHAS4           | PLLCAGITTYSPL-RRYGLDKPGLNIGIAGLGGGLGHLAIRFAKAFGAKVTLISSSVKKKREALEKFGVDS            | 228 |
| UtoHYS             | -----SIRVAKAFGAKVTVISSTPGKKEEATKNFKADS                                             | 33  |
| UtoTHAS            | PLLCAGITTYSPL-KNFGLDKPGHLHVGVAAGLGGGLGHVAVKFLKAFGAKVTVISSSDNKKKEAIEKYGADA          | 137 |
| MspTHAS            | PLLCAGSTVYSPM-MYYGLSKPGTHLGVAGLGGGLGHVAVKFAKAFGEVTVISTSPSKKEEAINHLGADH             | 249 |
| MSTRG5530(Rte-YOS) | PLLCAGITVYSTM-KHYGIAKAGNHIGVNLGGLGHHVAVKFAKAMGAKVTVISTSGSKKDEAINLLGADA             | 232 |
| MSTRG5531(Rte-YOS) | PLLCAGITVYSPM-KYYGIAKPGNHIGVNLGGLGHHMAVFAKALGAKVTVISSSESKKDDSIINRLGADA             | 232 |
| HpaTHAS2           | PLLCAGITTYSPL-RYFGLDKPGTHVGVVGLGGGLGHVAVKFAKAFGAKVTVISTSEGKKKEAIEKLGADA            | 144 |
| HpaTHAS            | PLLCAGITTYSPL-RYFGLDKPGIHHIGVVGGLGGGLGHVAVKFAKAFGAKVTLISTASKKQDAIEKLGADS           | 145 |
| MSTRG5534(Rte-YOS) | PLLCAGITTYSPL-RYFGLDKPGTHVGIIVGLGGGLGHVAVKFAKAFGAETVISTSESKKQEAIEKLGADA            | 231 |

[illegible]

| Consensus          |
|--------------------|
| RteTHAS5           |
| CroTHAS2           |
| CroTHAS3           |
| RteTHAS2           |
| RteTHAS            |
| RteTHAS3           |
| RteTHAS4A          |
| RteTHAS4B          |
| CroTHAS1           |
| RteYOS             |
| RteAMS             |
| CroHYS             |
| CroTHAS4           |
| UtoHYS             |
| UtoTHAS            |
| MspTHAS            |
| MSTRG5530(Rte-YOS) |
| MSTRG5531(Rte-YOS) |
| HpaTHAS2           |
| HpaTHAS            |
| MSTRG5534(Rte-YOS) |

|        |     |            |
|--------|-----|------------|
|        |     |            |
| --NTLK | SXX | -----      |
| LEN    | RR  | TAGSVVLI   |
| P      | D   | TIDQ*      |
| 330    |     |            |
| --NTLK | SA  | -----      |
| 371    |     |            |
| --NS   | LG  | SV-----    |
| 377    |     |            |
| --NTLK | SA  | -----      |
| 371    |     |            |
| --NTLK | SA  | -----      |
| 371    |     |            |
| --NTLK | SA  | *-----     |
| 372    |     |            |
| --NTLK | SA  | *-----     |
| 389    |     |            |
| --NTLK | SA  | *-----     |
| 358    |     |            |
| --NTLK | SN  | -----      |
| 356    |     |            |
| --NTL  | RS  | *-----     |
| 358    |     |            |
| --N    | CL  | KA         |
| 362    |     |            |
| --NTLK | SP  | SF-----    |
| 359    |     |            |
| --NTLK | SP  | SF-----    |
| 359    |     |            |
| -----  |     | 119        |
| -----  |     | 223        |
| --NTL  | V   | ATTST----- |
| 381    |     |            |
| --NTL  | R   | AP*-----   |
| 362    |     |            |
| --NTL  | K   | AP*-----   |
| 362    |     |            |
| ---    | L   | -----      |
| 274    |     |            |
| --NTLK | ST  | *-----     |
| 275    |     |            |
| --NTLK | SA  | *-----     |
| 361    |     |            |

## Supplementary material 4.

### SA concentration experiment

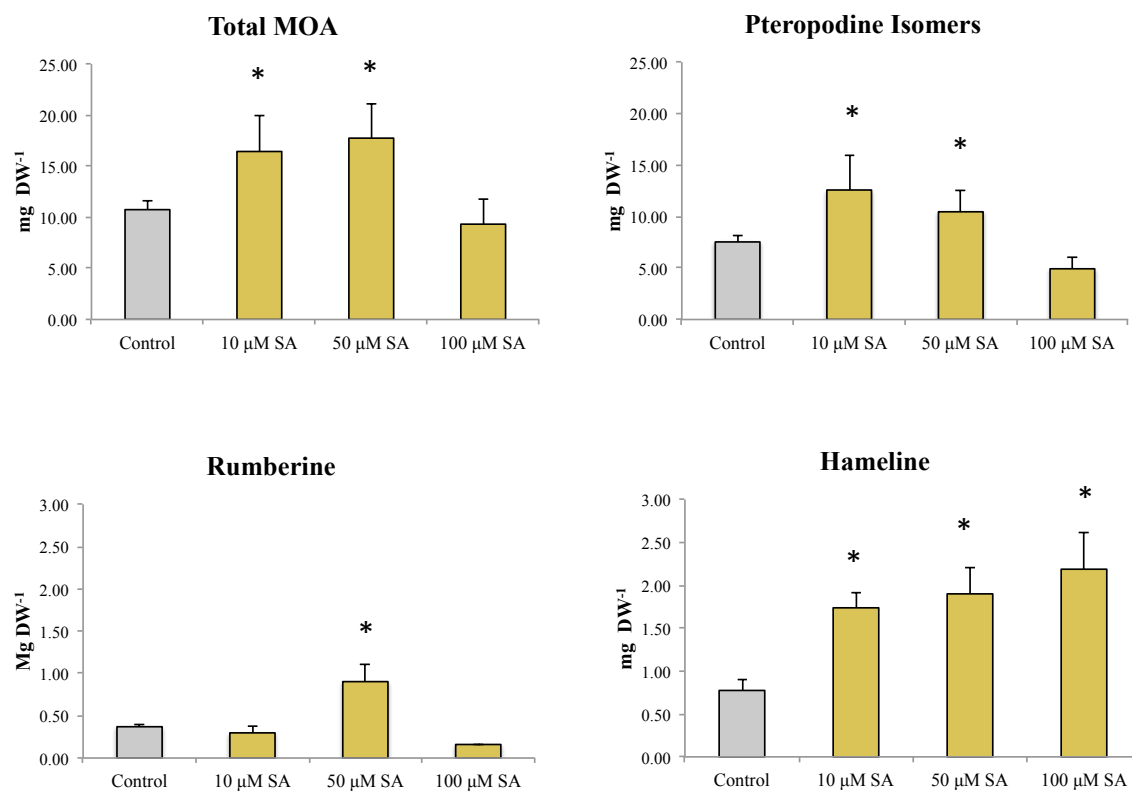

**Figure S2.** MOA production in 1.5-month-old *H. patens* plants, under different SA treatments after 120 h (n=3).

## Supplementary material 5.

HPLC chromatogram of the *H. patens* extract indicating the retention times of each MOA.

Alkaloid detection was at 244 nm. Retention times: [1] rumberine 9.4 min, [2] speciophylline 13.5 min, [3] uncarine F 16.5 min, [4] hameline 20 min, [5] pteropodine 23.2 min, [6] isopteropodine 40.9 min.

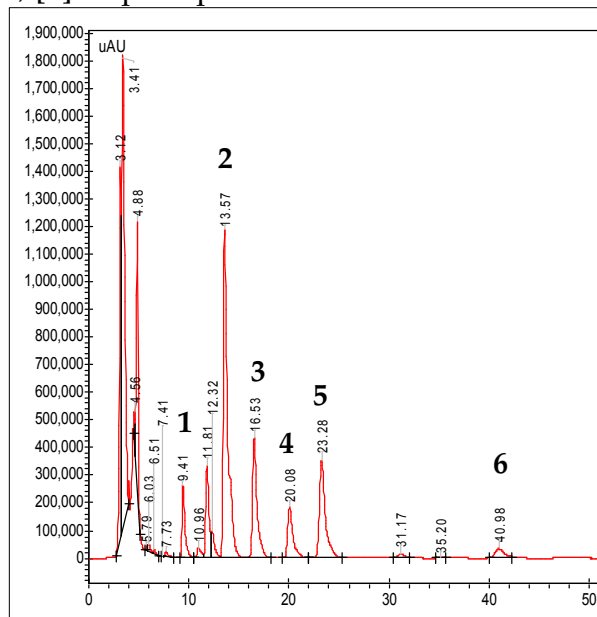

Supplement: s1 [file s1]
